# Supplementary material for: Kidney Function in Rice Workers Exposed to Heat and Dehydration in Costa Rica
Source: MDPI journal article supplement (doi:10.3390/ijerph19094962), 2022-04-19
Supplement: s1 [file s1]

**Table S1.** Characteristics of study population (men only) at baseline (n=79) and at with complete data at three month follow-up (n=72).

|                                                                                                          | All men (n=79) | Complete data at follow-up (n=72) |
|----------------------------------------------------------------------------------------------------------|----------------|-----------------------------------|
|                                                                                                          | median (IQR)   | median (IQR)                      |
| Age (years), median (IQR)                                                                                | 40 (33-49)     | 40 (33.4-49.5)                    |
| Education (years), median (IQR)                                                                          | 6 (6-9)        | 6.5 (6-9)                         |
| Current job (years), median (IQR)                                                                        | 10 (3-16)      | 10 (3-15.5)                       |
| Farmworker (years), median (IQR)                                                                         | 9.5 (4-12)     | 9 (4-12)                          |
|                                                                                                          | %              | %                                 |
| Incomplete primary education                                                                             | 20%            | 21%                               |
| Born in Costa Rica                                                                                       | 84%            | 82%                               |
| Married/living as married                                                                                | 77%            | 76%                               |
| Past work similar work at another company                                                                | 62%            | 61%                               |
| Past work in sugarcane                                                                                   | 34%            | 32%                               |
| Past work as a sugarcane fieldworker                                                                     | 15%            | 15%                               |
| Past work not in agriculture                                                                             | 32%            | 32%                               |
| Consumption of alcohol                                                                                   | 75%            | 75%                               |
| Current smoker                                                                                           | 9%             | 8%                                |
| High blood pressure                                                                                      | 20%            | 21%                               |
| Diabetes                                                                                                 | 14%            | 14%                               |
| Urinary tract infection during (ever)                                                                    | 20%            | 18%                               |
| Chistate (ever)                                                                                          | 75%            | 74%                               |
| Obese (BMI ≥30)                                                                                          | 25%            | 28%                               |
| Pain medication last week(a)                                                                             | 33%            | 34%                               |
| NSAID last week (a)                                                                                      | 22%            | 13%                               |
| Ever pesticide use(b)                                                                                    | 69%            | 69%                               |
| Ever paraquat use (b)                                                                                    | 62%            | 61%                               |
| Ever glyphosate use(b)                                                                                   | 48%            | 49%                               |
| Ever fungicide use (b, c)                                                                                | 15%            | 16%                               |
| Dehydrated at (USG ≥1.025) enrollment                                                                    | 54%            | 54%                               |
| Proteinuria one plus or higher enrollment                                                                | 19%            | 19%                               |
| Hematuria (dipstick, traces or more) enrollment                                                          | 4%             | 3%                                |
| Casts (any) enrollment (d)                                                                               | 8%             | 7%                                |
| Crystals (any) enrollment (d, f)                                                                         | 16%            | 6%                                |
| eGFR<60 enrollment                                                                                       | 10%            | 10%                               |
| eGFR<90 at enrollment                                                                                    | 71%            | 74%                               |
| a) 15 missing data for first column/ 10 missing for second column, percentage shown out of complete data |                |                                   |
| b) 8 missing data for first column/ 2 missing for second column, percentage shown out of complete data   |                |                                   |
| d) 4 missing data in both columns, percentage shown out of complete data                                 |                |                                   |

**Table S2.** Results from bivariate linear regression analysis (n=72) presenting beta estimates with 95%CI for selected variables (estimates with p<0.05 in bold).

| Variables           | β estimate for eGFR at enrollment |     |          |             |
|---------------------|-----------------------------------|-----|----------|-------------|
|                     | median                            | IQR | estimate | 95%CI       |
| Age (years)         |                                   |     | -0.69    | -1.05 -0.34 |
| Current job (years) |                                   |     | -0.48    | -0.97 0.00  |
|                     | n                                 | %   | estimate | 95%CI       |

---

|                                          |    |     |       |        |       |
|------------------------------------------|----|-----|-------|--------|-------|
| Field worker                             | 27 | 38% | -4.89 | -14.20 | 4.42  |
| Past work at another company             | 44 | 61% | 2.01  | -6.27  | 10.29 |
| Past work as a sugarcane cutter          | 9  | 13% | -3.53 | -9.56  | 2.51  |
| Past work in sugarcane fields            | 11 | 15% | -3.40 | -8.94  | 2.14  |
| Past work in construction/mining/fishing | 23 | 32% | 2.80  | 1.47   | 7.07  |
| Consumption of alcohol                   | 54 | 75% | -2.40 | -12.17 | 7.36  |
| Current smoker                           | 6  | 8%  | 4.90  | -20.08 | 29.88 |
| High blood pressure                      | 15 | 21% | -3.14 | -14.75 | 8.48  |
| Diabetes                                 | 10 | 14% | -3.92 | -16.36 | 8.51  |
| Ever urinary tract infection             | 13 | 18% | 1.70  | -8.71  | 12.11 |
| Ever chistate                            | 53 | 74% | 1.13  | -7.58  | 9.84  |
| Obese (BMI $\geq 30$ )                   | 20 | 28% | 3.72  | -4.97  | 12.41 |
| Pain medication last week(a)             | 21 | 34% | 9.27  | -0.57  | 19.11 |
| NSAID last week (a)                      | 8  | 13% | -0.48 | -17.87 | 16.90 |
| Ever pesticide use                       | 48 | 67% | -2.92 | -11.20 | 5.36  |
| Ever paraquat use                        | 43 | 60% | -0.71 | -8.74  | 7.32  |
| Ever glyphosate use                      | 34 | 47% | -1.88 | -10.18 | 6.42  |
| Ever carbamate, lannate, benomyl use     | 8  | 11% | -0.65 | -13.45 | 12.16 |

(a)n= 3 (11%) of farmworkers and n=8 (16%) of other workers with missing data at baseline; Percentages shown are out of complete data.

**Table S3.** Sensitivity analysis for multivariate stepwise regression model for eGFR at baseline (Table 3) excluding cases where pain medication data were missing at baseline (15% of participants). (R2adj = 0.27).

| Y                  | Term                                  | Estimate | p    | Lower 95% | Upper 95% |
|--------------------|---------------------------------------|----------|------|-----------|-----------|
| eGFR at enrollment | Intercept                             | 112.14   | 0.00 | 96.65     | 127.64    |
|                    | Age                                   | -0.72    | 0.00 | -1.08     | -0.35     |
|                    | Current field worker                  | -4.24    | 0.03 | -8.14     | -0.33     |
|                    | Past work in construction             | 3.21     | 0.16 | -1.26     | 7.68      |
|                    | Pain medication during the last week* | 4.11     | 0.05 | -0.06     | 8.29      |
|                    |                                       |          |      |           |           |

\*Pain medication variable excluded for 15% with missing medication data at baseline.

**Table S4.** Bivariate analysis for 1) difference in eGFR after three months and 2) IKI from Poisson regression. .

| Variables                                      | median | IQR | Dif-<br>eGFR  |               |              | IKI         |             |             |
|------------------------------------------------|--------|-----|---------------|---------------|--------------|-------------|-------------|-------------|
|                                                |        |     | estimate      | 95%CI         |              | estimate    | 95%CI       |             |
| Age (years)                                    |        |     | 0.15          | -0.26         | 0.57         | 1.01        | 0.95        | 1.08        |
|                                                | n      | %   | estimate      | 95%CI         |              | estimate    | 95%CI       |             |
| Field worker                                   | 27     | 38% | -7.59         | -17.58        | 2.41         | <b>2.44</b> | <b>1.20</b> | <b>6.30</b> |
| Consumption of alcohol                         | 54     | 75% | 1.96          | -9.66         | 13.58        | 0.84        | 0.43        | 1.83        |
| Current smoker                                 | 6      | 8%  | <b>-13.07</b> | <b>-25.52</b> | <b>-0.61</b> | 1.79        | 0.69        | 3.63        |
| High blood pressure                            | 15     | 21% | 0.94          | -7.54         | 9.42         | 1.01        | 0.39        | 2.05        |
| Diabetes                                       | 10     | 14% | -8.23         | -18.24        | 1.77         | <b>2.12</b> | <b>1.06</b> | <b>4.14</b> |
| Obese (BMI ≥30)                                | 20     | 28% | 0.00          | -7.34         | 7.35         | 0.58        | 0.13        | 1.34        |
| Pain medication last week (3-month visit) (a)  | 21     | 34% | <b>-9.98</b>  | <b>-19.62</b> | <b>-0.35</b> | 1.58        | 0.81        | 3.19        |
| NSAID last week (3-month visit) (a)            | 8      | 13% | -7.09         | -17.72        | 3.54         | 1.40        | 0.54        | 2.86        |
| Current pesticide use                          | 14     | 19% | 3.24          | -10.94        | 17.42        | 1.16        | 0.17        | 4.81        |
| Current paraquat use                           | 12     | 17% | -3.54         | -16.96        | 9.88         | 1.41        | 0.21        | 5.81        |
| Current glyphosate use                         | 10     | 14% | 7.83          | -11.28        | 26.94        | 0.76        | 0.04        | 4.16        |
| Dehydrated at enrollment                       | 39     | 54% | 0.35          | -8.56         | 9.26         | 0.50        | 0.19        | 1.02        |
| Dehydrated at 3-month follow-up                | 32     | 44% | -5.47         | -13.55        | 2.62         | 1.12        | 0.54        | 2.30        |
| Dehydrated at enrollment and 3-month follow-up | 25     | 35% | -3.96         | -11.94        | 4.03         | 0.74        | 0.29        | 1.51        |

(a) 3 (8%) of farmworkers and 7 (16%) of non-farmworkers with missing data at baseline; Percentages shown are out of complete data.
